# The American Journal of Psychiatry

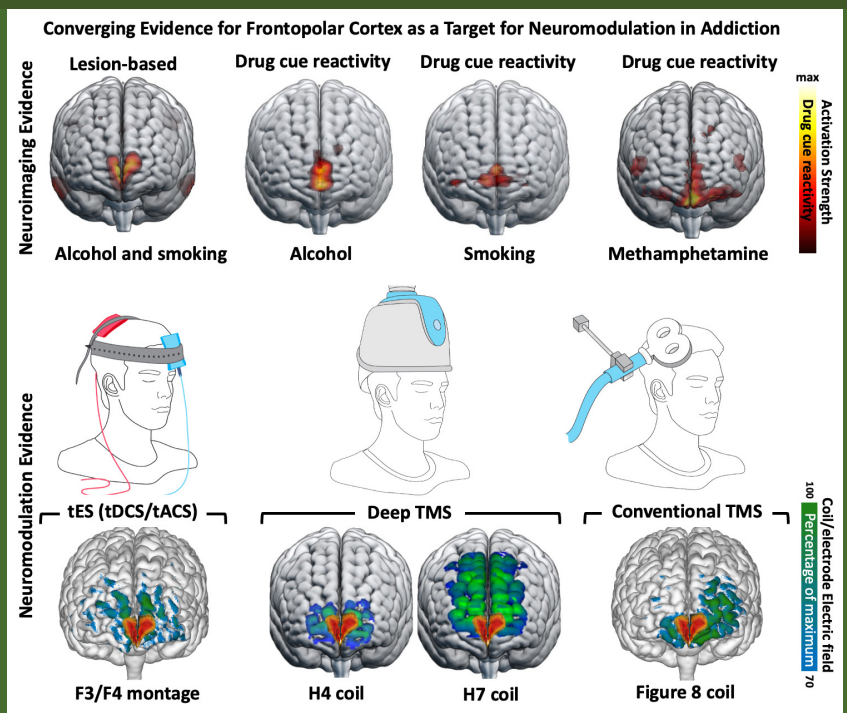

Converging Evidence for Frontopolar Cortex as a Target for  
Neuromodulation in Addiction Treatment

Effects of Bundling Medication for Opioid Use Disorder  
With an mHealth Intervention Targeting Addiction

Mindfulness-Oriented Recovery Enhancement for Veterans and  
Military Personnel on Long-Term Opioid Therapy for Chronic Pain

The Long-Term Relationship Between Cannabis and Heroin Use
